# Supplementary material
Source: HighWire-hosted journal article supplement (https://bmjopenquality.bmj.com/content/5/1/u212167.w3007)
Supplement: inline-supplementary-material-1 [file inline-supplementary-material-1.pdf]

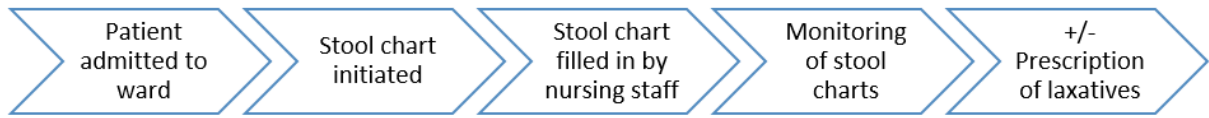

*Figure 1 – Process map demonstrating the steps involved in the monitoring of bowel frequency in hospital inpatients.*
