# Supplementary material
Source: HighWire-hosted journal article supplement (https://bmjopenquality.bmj.com/content/5/1/u212167.w3007)

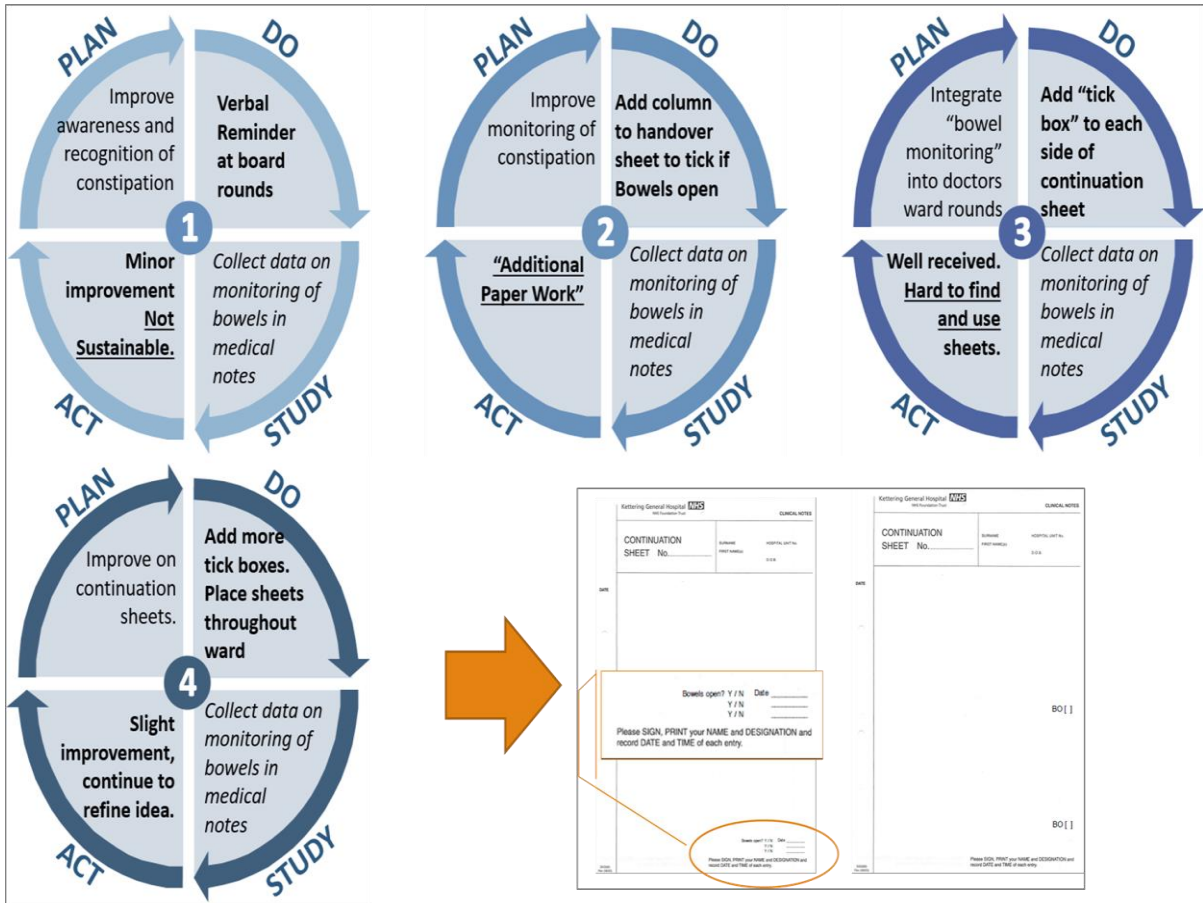

Supplement: inline-supplementary-material-2 [file inline-supplementary-material-2.pdf]
